# Supplementary material
Source: publisher figshare collection journal article supplement (https://acs.figshare.com/ndownloader/files/13215863)
Supplement: Supplementary file 1 [file 13215863]

# Supporting Information

## Band Renormalization of Blue Phosphorus on Au(111)

Evangelos Golias,<sup>\*,†,‡</sup> Maxim Krivenkov,<sup>†</sup> Andrei Varykhalov,<sup>†</sup> Jaime

Sánchez-Barriga,<sup>†</sup> and Oliver Rader<sup>†</sup>

<sup>†</sup>*Helmholtz-Zentrum Berlin für Materialien und Energie, Elektronenspeicherring BESSY II,  
Albert-Einstein Straße 15, 12489 Berlin, Germany*

<sup>‡</sup>*Institut für Experimentalphysik, Freie Universität Berlin, Arnimallee 14, 14195 Berlin,  
Germany*

E-mail: [evangelos.golias@gmail.com](mailto:evangelos.golias@gmail.com)

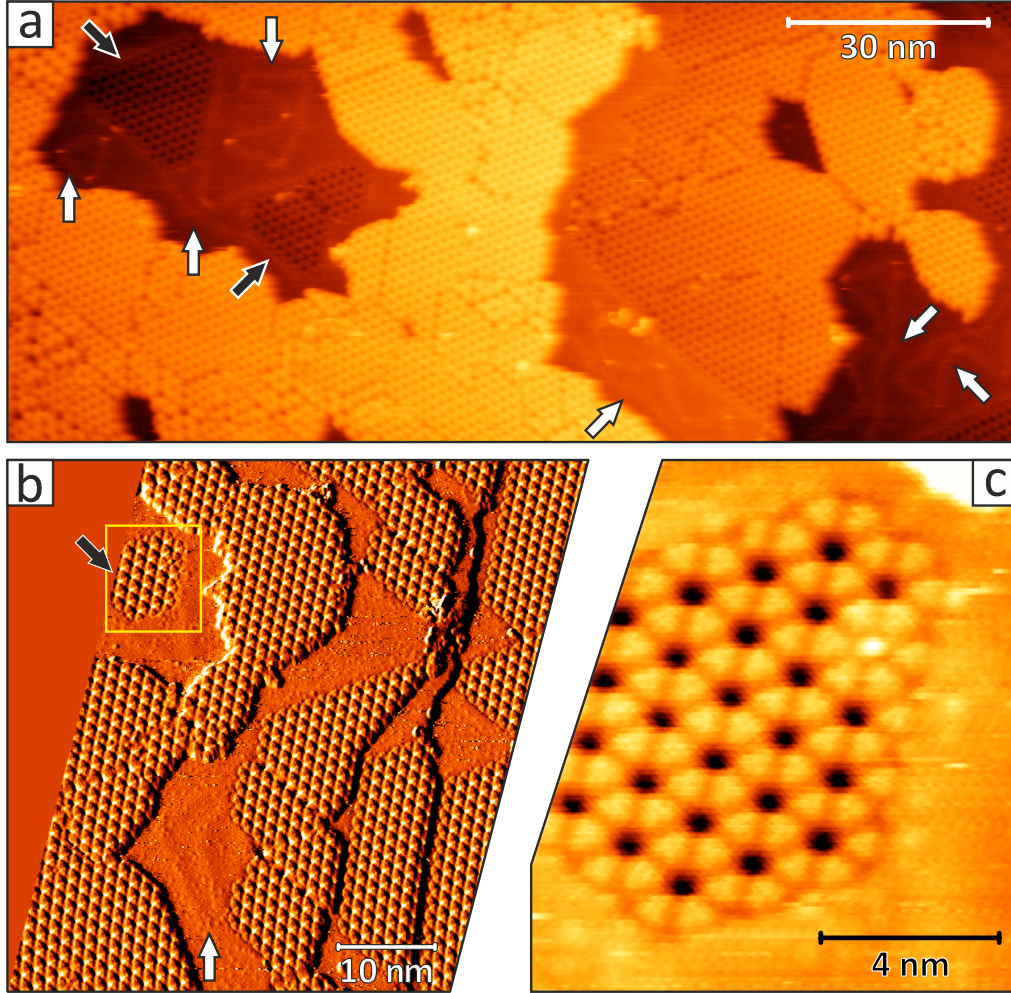

Figure S1: STM visualization of  $(4 \times 4)$ -BlueP patches incorporated into the top-most Au layer. (a) large-scale image, patches of  $(4 \times 4)$ -BlueP are marked with black arrows. On areas free from P one can see lines and loops of a modified herringbone reconstruction (marked with white arrows). (b) Large-scale current channel STM image of a different region showing a  $(4 \times 4)$ -BlueP patch and islands connected to the step edges of Au(111). Details of the phosphorus-gold border region are similar in both cases. A close-up of the  $(4 \times 4)$ -BlueP patch in the yellow rectangle is shown in panel (c). Tunneling parameters were: (a)  $I_t = 0.5$  nA,  $U_t = 1$  V; (b), (c)  $I_t = 0.6$  nA,  $U_t = 1$  V.

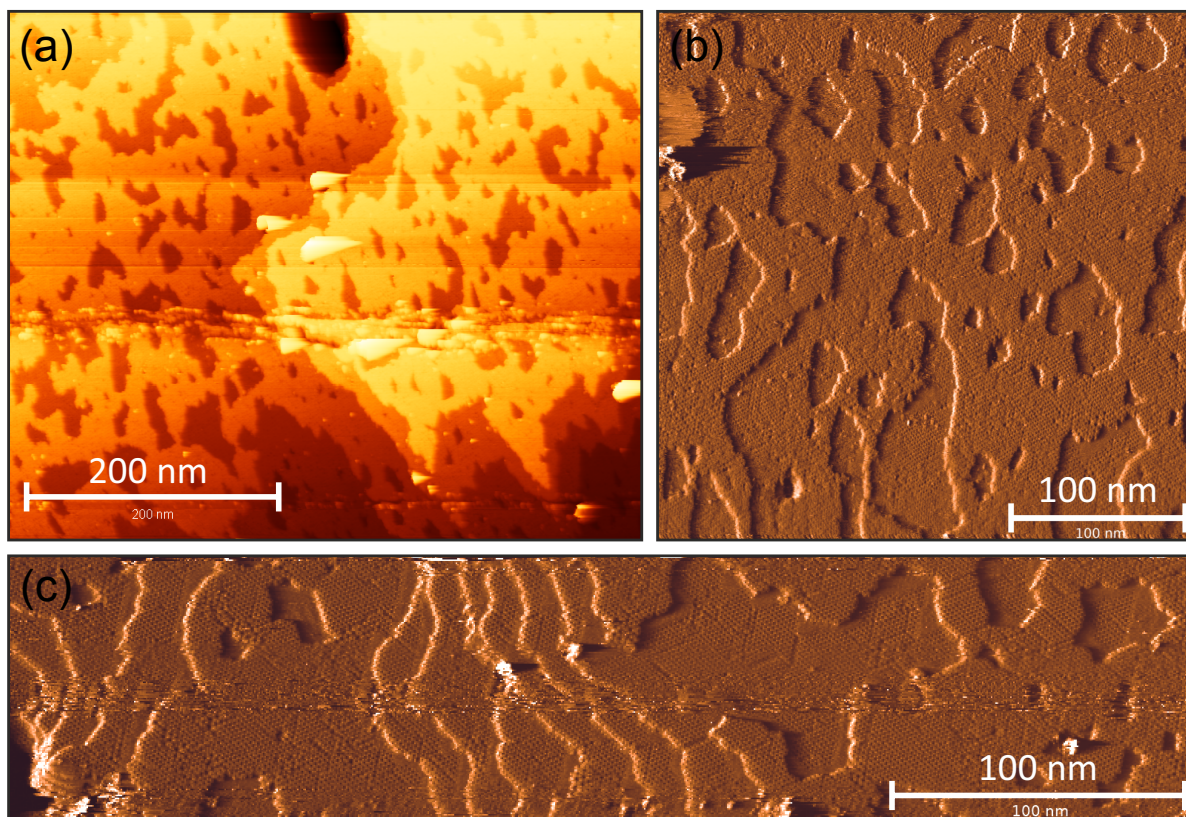

Figure S2: (a), (b) and (c) Large-scale STM images of BlueP on Au(111) prepared after P deposition with the substrate held at room temperature and a post-deposition annealing step at 250°C.

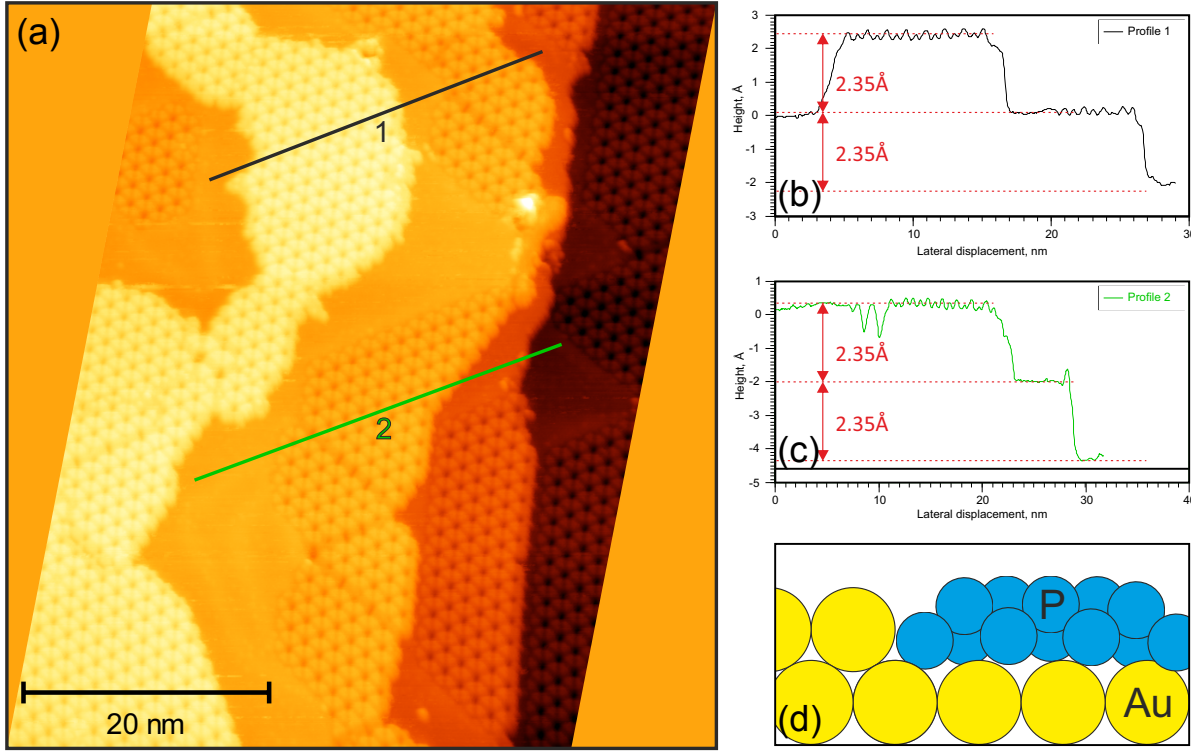

Figure S3: (a) STM image of BlueP on Au(111) after room temperature deposition and post-deposition annealing at 250°C. (b), (c) Line profiles along the marked segments in (a). (d) Ball and stick model representation corresponding to (b), (c).

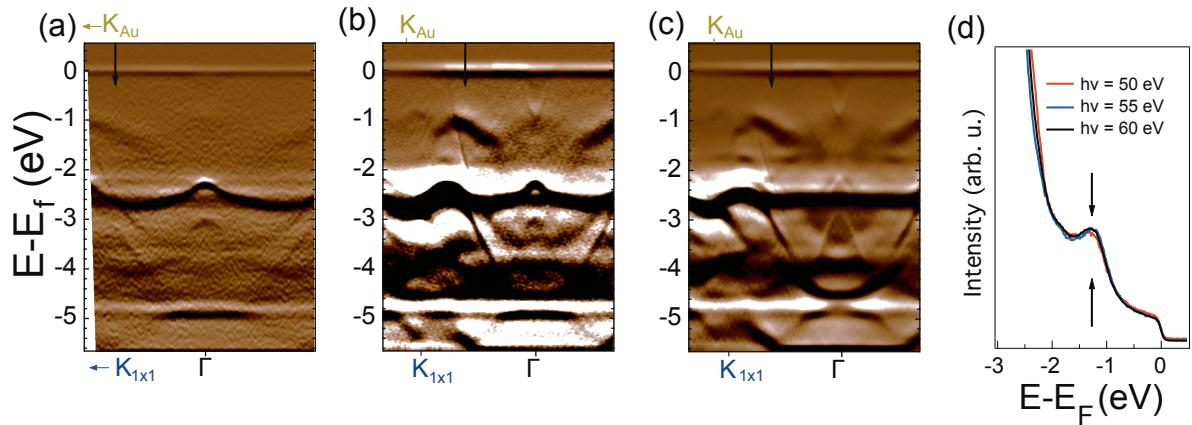

Figure S4: (a) ARPES spectra along the  $\Gamma K$  high-symmetry direction for excitation energies of (a) 50, (b) 55, and (c) 60 eV. (d) Energy distribution curves at  $k_{||} = 0.8 \text{ \AA}^{-1}$ , marked with black arrows in (a)-(c), of the (4 x 4)-BlueP on Au(111).



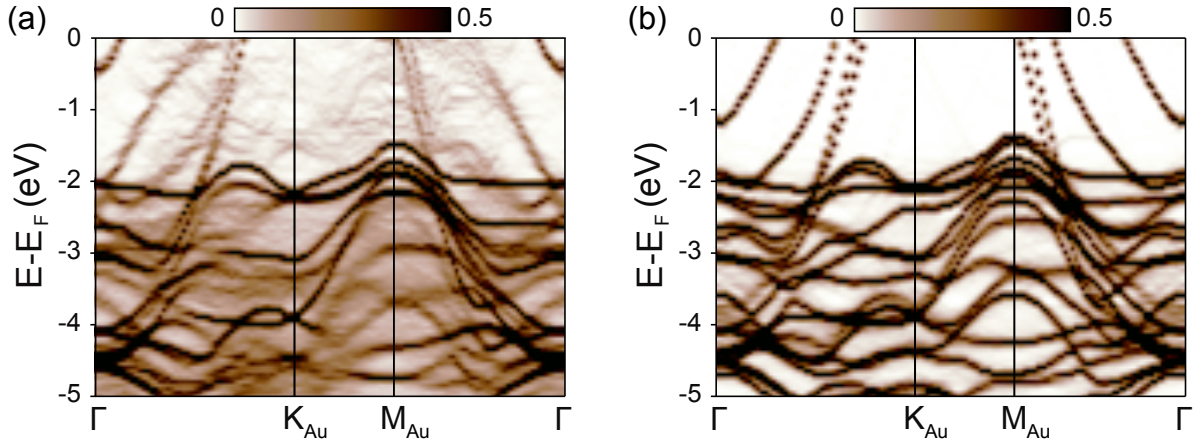

Figure S5: Effective band structure of (a) (4 x 4)-BlueP on (5 x 5)-Au(111) and (b) pristine (5 x 5)-Au(111), unfolded to the BZ of (1 x 1)-Au(111)

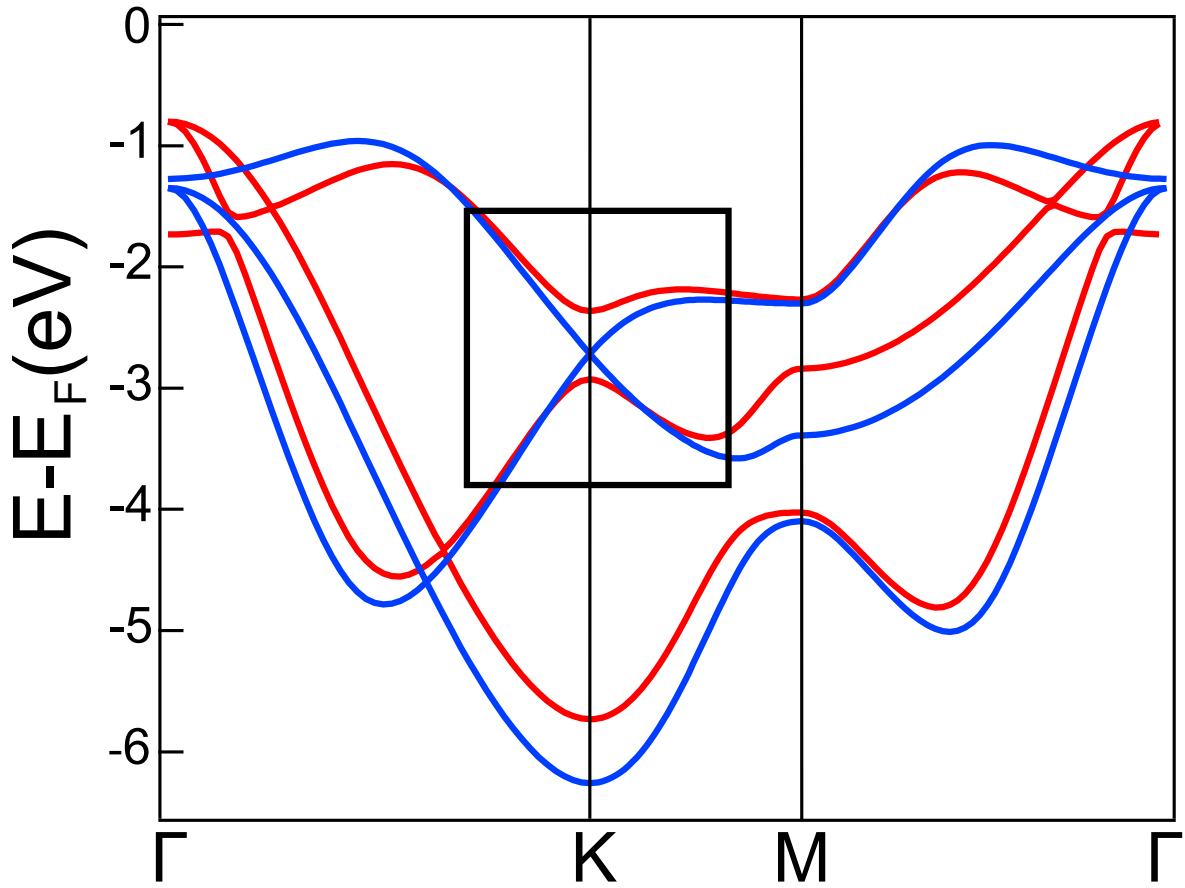

Figure S6: Freestanding band structure calculation of pristine BlueP (blue line) and BlueP with a Li atom on top of one of BlueP's unit cell atoms (red line). The Li atom breaks the sublattice symmetry and a gap opens at the  $K$  point — region highlighted by black frame.

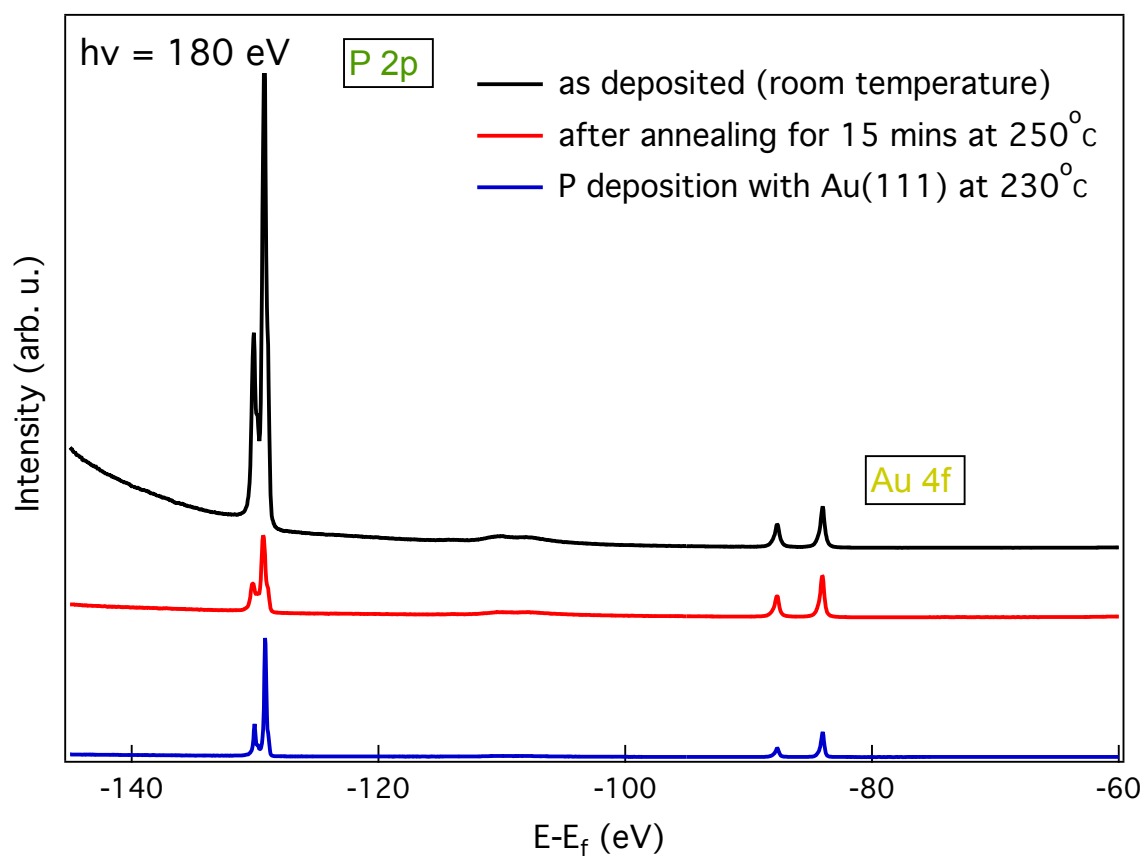

Figure S7: P 2p and Au 4f core levels of (4 x 4)-BlueP on Au(111) under different preparation conditions (see legend).
